# Supplementary material
Source: HighWire-hosted journal article supplement (https://cmaj.ca/highwire/filestream/146579/field_highwire_adjunct_files/4/211881-res-5-at.pdf)
Supplement: 211881-res-5-at.pdf [file 211881-res-5-at.pdf]

**Supplementary Appendix 5:** Relative ratios, seroconversion and proportion of patients attaining the median convalescent serum level for SARS-CoV-2 after BNT162b2 or mRNA-1273 vaccination excluding patients with prior COVID-19 or anti-nucleocapsid seroconversion

| Weeks after second dose | Antibody   | Relative ratio, median (IQR)* |                  | No. (%) of patients with seroconversion† |                 | No. (%) of patients who reached convalescent level‡ |                 |
|-------------------------|------------|-------------------------------|------------------|------------------------------------------|-----------------|-----------------------------------------------------|-----------------|
|                         |            | BNT162b2                      | mRNA-1273        | BNT162b2                                 | mRNA-1273       | BNT162b2                                            | mRNA-1273       |
| 6-7                     | Anti-spike | 1.57 (1.17-1.67)              | 1.72 (1.68-1.79) | 55 (96)<br>n=57                          | 73 (96)<br>n=76 | 38 (67)<br>n=57                                     | 72 (95)<br>n=76 |
|                         | Anti-RBD   | 1.09 (0.48-1.50)              | 1.42 (1.29-1.52) | 49 (86)<br>n=57                          | 73 (96)<br>n=76 | 26 (46)<br>n=57                                     | 59 (78)<br>n=76 |
|                         | Anti-NP    | -                             | -                | 0 (0)<br>n=57                            | 0 (0)<br>n=76   | 0 (0)<br>n=57                                       | 0 (0)<br>n=76   |
| 12                      | Anti-spike | 1.42 (1.01-1.58)              | 1.93 (1.76-2.01) | 103 (95)<br>n=108                        | 62 (95)<br>n=65 | 58 (54)<br>n=108                                    | 62 (95)<br>n=65 |
|                         | Anti-RBD   | 0.84 (0.33-1.35)              | 1.30 (1.04-1.43) | 93 (86)<br>n=108                         | 61 (94)<br>n=65 | 37 (34)<br>n=108                                    | 39 (60)<br>n=65 |
|                         | Anti-NP    | -                             | -                | 0 (0)<br>n=108                           | 0 (0)<br>n=65   | 0 (0)<br>n=108                                      | 0 (0)<br>n=65   |

Note: IQR=interquartile range, NP=nucleocapsid protein, RBD=receptor binding domain.

Note: Patients were excluded if they had a positive RT-PCR for SARS-CoV-2 or anti-NP seroconversion at any point

\* Summary statistics are not reported for anti-NP as it used as a binary measure of natural SARS-CoV-2 infection.

†Antibody levels are reported as relative ratios to synthetic standards. Seroconversion threshold level represents a positive test and are 0.19, 0.186, and 0.396 for anti-spike, anti-RBD, anti-NP antibodies, respectively.

Appendix 5, as supplied by the authors. Appendix to: Yau K, Chan CT, Abe KT, et al. Differences in mRNA-1273 (Moderna) and BNT162b2 (Pfizer-BioNTech) SARS-CoV-2 vaccine immunogenicity among patients undergoing dialysis. *CMAJ* 2022. doi: 10.1503/cmaj.211881. Copyright © 2022 The Author(s) or their employer(s). To receive this resource in an accessible format, please contact us at cmajgroup@cmaj.ca.

‡ The median level of antigen in convalescent serum is from a cohort of 211 patients in the general population with prior COVID-19 of all severities represents a robust antibody response: 1.38, 1.25, and 1.13 for anti-spike, anti-RBD, and anti-NP antibodies respectively.
